# Supplementary material for: Biological Effects of EF24, a Curcumin Derivative, Alone or Combined with Mitotane in Adrenocortical Tumor Cell Lines
Source: MDPI journal article supplement (doi:10.3390/molecules24122202), 2019-06-12
Supplement: s1 [file s1]

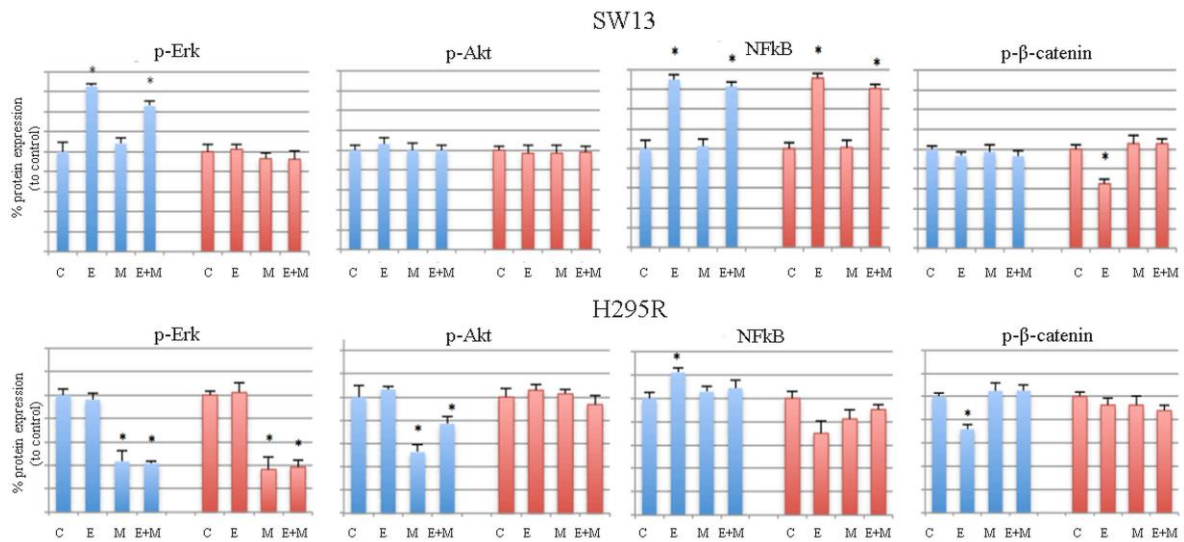

**Figure 1.** Western blot quantitative densitometry for SW13 and H295R cells treated for 24h and 72h respectively. A) SW13 cells; B) H295R cells. C: control. E: EF24 at 6.5  $\mu$ M for SW13 and 5  $\mu$ M for H295R cells. E+M: EF24+mitotane. M: mitotane 8  $\mu$ M for SW13 and 10  $\mu$ M for H295R cells. Comparison of phosphorylated proteins expression as a ratio normalized to untreated control levels. Treatment vs control: \*  $P < 0.05$ .

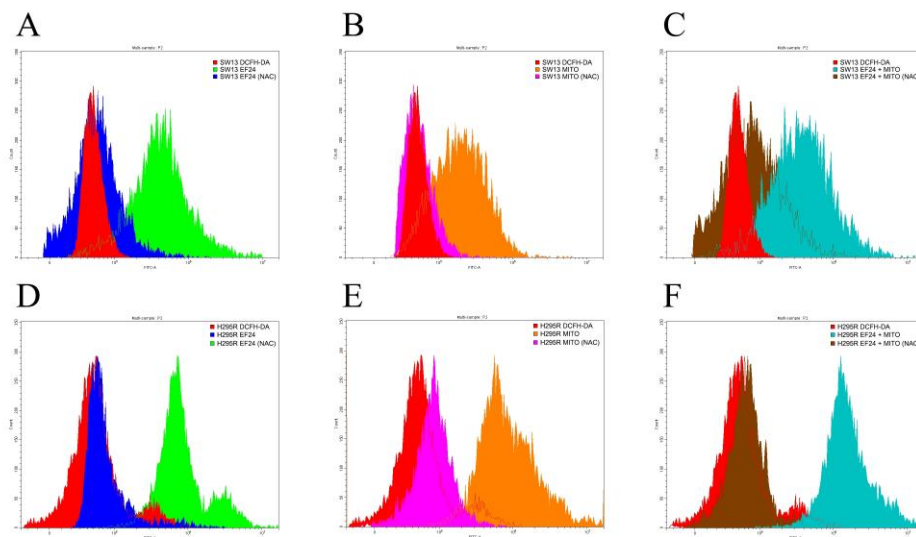

**Figure 2.** Representative flow cytometric analysis of intracellular ROS levels in SW13 and H295R cells treated for 24h and 72h respectively, with EF24, mitotane or their combination. DCFH-DA= 2',7'-dichlorofluorescein diacetate. NAC= N-acetyl-cysteine. E=EF24. M=mitotane. E+M=EF24+mitotane.
